# Supplementary material for: Venetoclax improves CD20 immunotherapy in a mouse model of MYC/BCL2 double-expressor diffuse large B-cell lymphoma
Source: HighWire-hosted journal article supplement (doi:10.1136/jitc-2022-006113), 2023-02-01
Supplement: jitc-2022-006113supp001_data_supplement.pdf [file jitc-2022-006113supp001_data_supplement.pdf]

## SUPPLEMENTAL MATERIAL

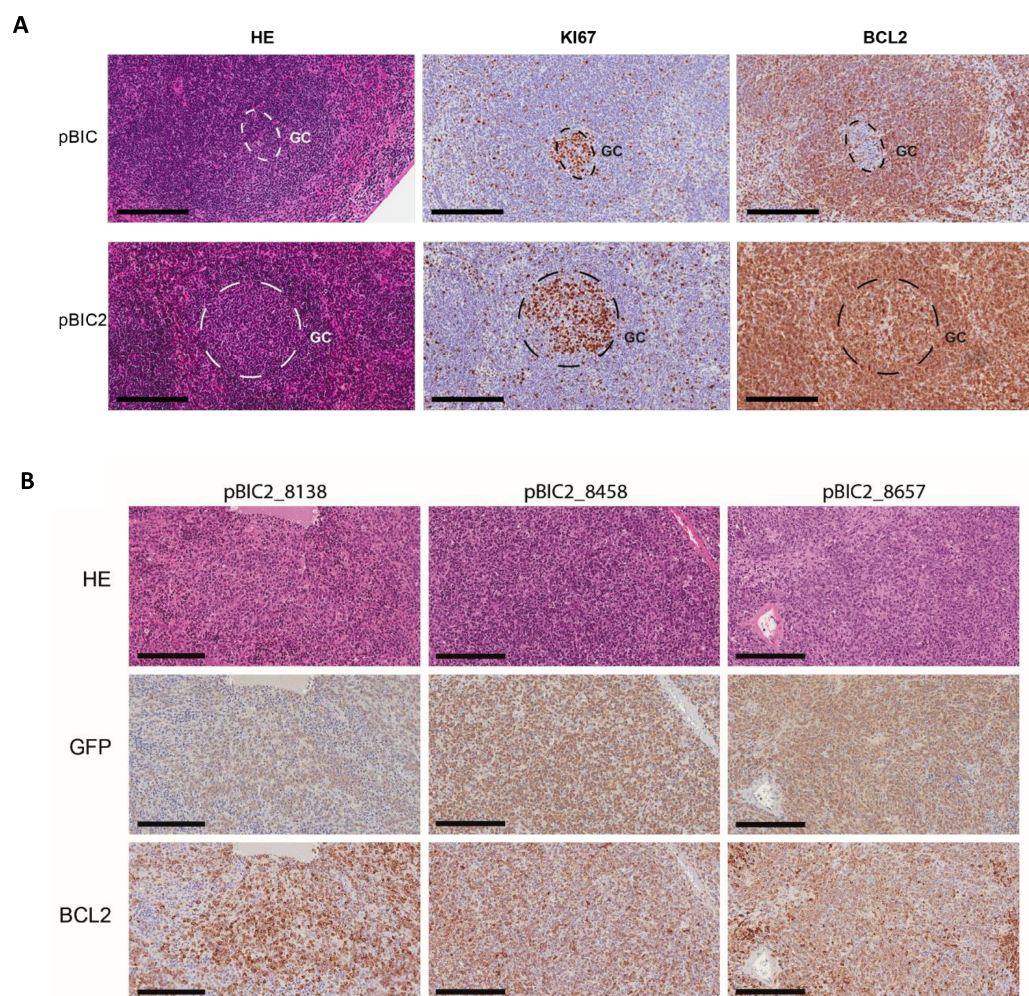

**Supplementary Figure S1.** (A) Representative Hematoxylin-Eosin (HE) and IHC staining of Ki67 and BCL2 of splenic sections from young pBIC and pBIC2 mice during secondary immune response to SRBC immunizations (i.e. 100 days of life), supporting that BCL2 is normally downregulated in germinal centers (Ki67<sup>+</sup> GC, dotted circles) while it remains expressed in pBIC2. The BCL2 antibody recognizes both human and murine BCL2 (see methods). Scale bar 200  $\mu$ m. (B) Representative IHC photos of three pBIC2 tumors (identified by different ear tag numbers). Histologic examinations by an expert pathologist in the field (O.B.) showed morphological features of high-grade B cell lymphomas compatible with human DLBCL characteristics and GFP<sup>+</sup>/BCL2<sup>+</sup> expression. Scale bar 200  $\mu$ m.

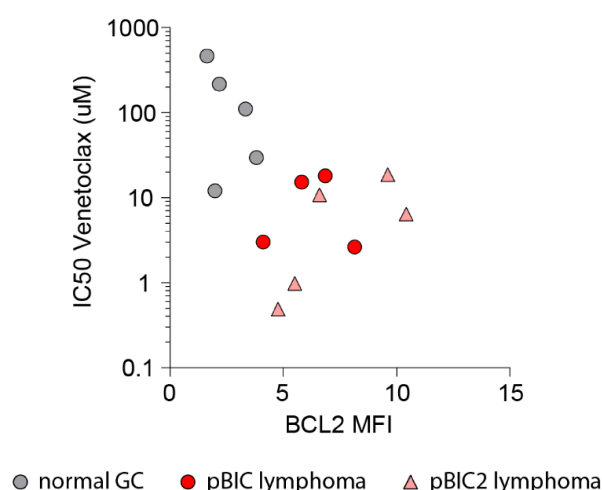

**Supplementary Figure S2.** Data supporting that BCL2 expression within tumor cells correlates with sensitivity to venetoclax. Grey dots represent YFP<sup>+</sup> GC B cells from YC control mice, dark red dots represent GFP<sup>+</sup> tumor cells from pBIC mice at advanced stages of the disease and light red triangles represent GFP<sup>+</sup> tumor cells from pBIC2 mice at advanced stages of the disease. IC50 was calculated following 24-hour treatment with escalating doses of venetoclax as described in Supplemental Methods. The sum of both mBCL2 and hBCL2 MFI values was normalized to the corresponding MFI observed in normal GC B cells from YC mice. Pearson's correlation,  $r = -0.5482$   $p = 0.0424$ . MFI, median fluorescence intensity.

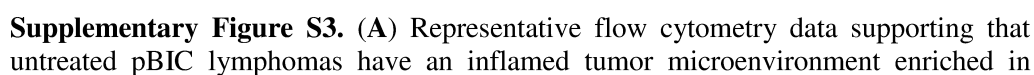

CD3<sup>+</sup>CD8<sup>+</sup> T cells with a high percentage of GFP<sup>+</sup> tumor cells, as opposed to normal spleen YC control mice and mice treated with venetoclax or  $\alpha$ CD20, alone or in combination, where CD3<sup>+</sup>CD4<sup>+</sup> T cells predominate and GFP<sup>+</sup> tumor cells appear significantly depleted after 4 weeks of treatment (half-time of overall treatment duration). (B) Representative flow cytometry data supporting that, compared to normal spleen YC mice (left), where Naïve (CD44<sup>+</sup>CD62L<sup>+</sup>, highlighted in red) T cells predominate; untreated pBIC lymphomas (right) have a tumor microenvironment enriched in CD44<sup>+</sup> cells (highlighted in purple), consisting mainly in effector/effector memory (E/EM, CD44<sup>+</sup>CD62L<sup>-</sup>, highlighted in green) and central memory (CM, CD44<sup>+</sup>CD62L<sup>+</sup>, highlighted in white rectangles) T cells, with almost complete absence of Naïve T cells. (C) Representative flow cytometry data supporting that both CD4 (top) and CD8 (bottom) central memory (CM, CD44<sup>+</sup>CD62L<sup>+</sup>PD1<sup>+/+</sup>, highlighted in white rectangles) intratumoral T cells in pBIC lymphomas are more sensitive to treatment regimens involving venetoclax than effector/effector memory (E/EM, CD44<sup>+</sup>CD62L<sup>-</sup>PD1<sup>+/+</sup>, highlighted in green) T cells, which is not evidenced in the anti-CD20 alone immunotherapy group.



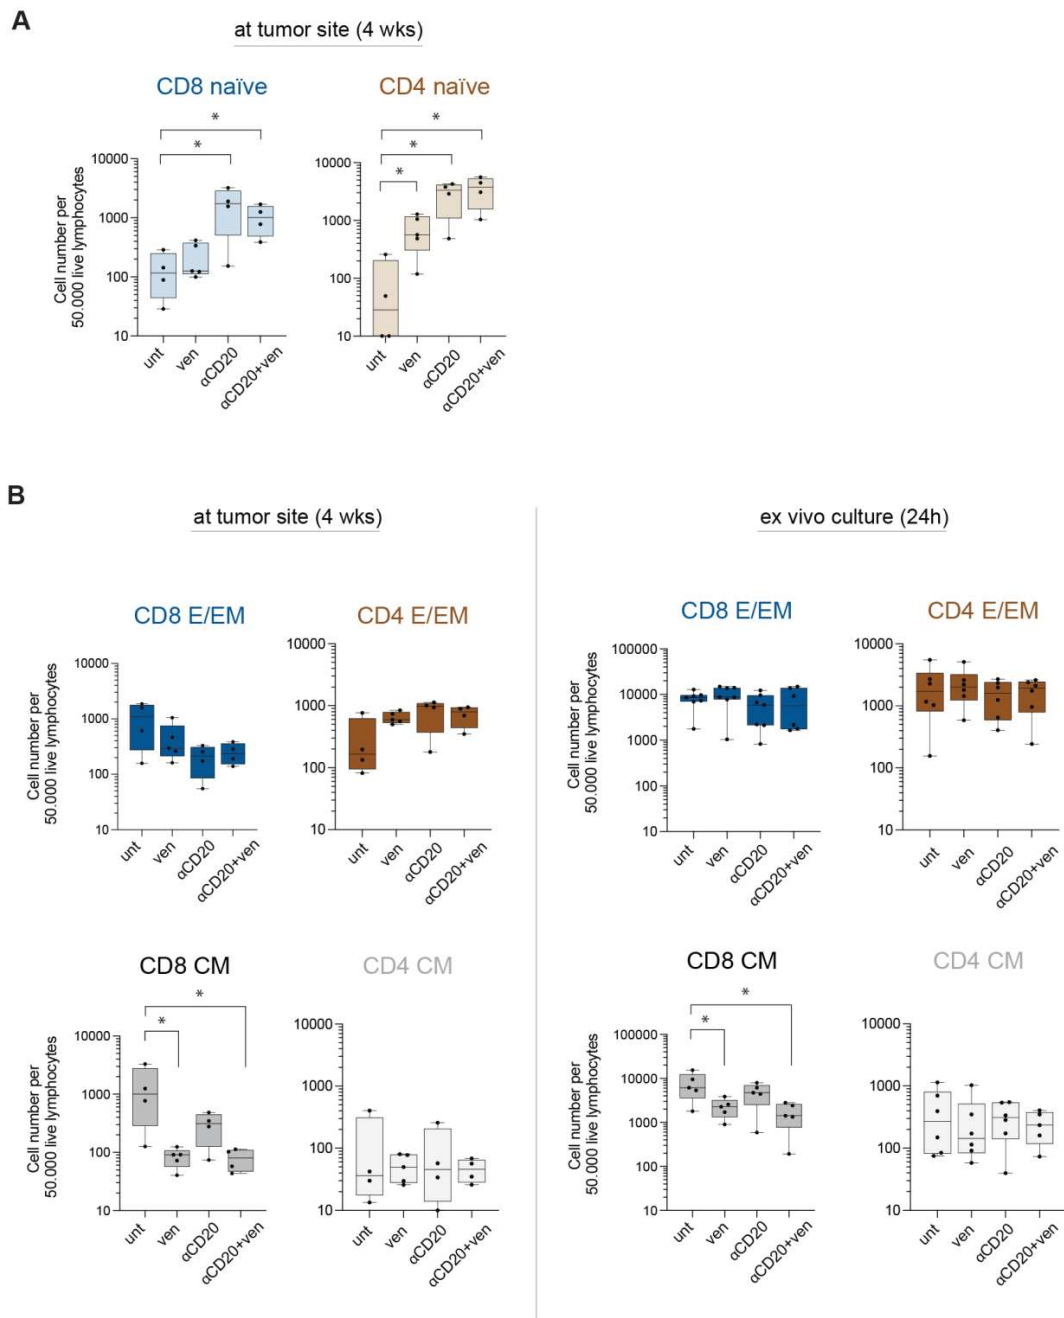

**Supplementary Figure S4.** Venetoclax treatment differentially affects cell numbers of murine T-cell subsets both *in vivo* and *ex vivo*. **(A)** Normalized absolute cell counts of naïve (CD44<sup>+</sup>CD62L<sup>+</sup>PD-1<sup>-</sup>) T cells within the CD8 and CD4 compartments of pBIC lymphomas (n ≥ 4) after 4 weeks of treatment. **(B)** Normalized absolute cell counts of Effector/Effect Memory (E/EM, CD44<sup>+</sup>CD62L<sup>+</sup>PD-1<sup>+</sup>) and Central Memory (CM, CD44<sup>+</sup>CD62L<sup>+</sup>PD-1<sup>+</sup>) T cells after *in vivo* treatment of pBIC lymphomas for 4 weeks (n ≥ 4, left panels), or as measured *ex vivo* after exposing primary pBIC tumour tissues to the different treatments for 24h (n ≥ 4, right panels). Nonparametric Mann-Whitney tests were used for statistical analysis: \*, p ≤ 0.05. Unt, untreated; ven, venetoclax; αCD20, anti-mouse CD20 monoclonal antibody.

**Supplementary Table 1.** List of flow cytometry antibodies used in this study.

| <b>Antigen</b>                          | <b>Channel</b> | <b>Clone</b> | <b>Provider</b> |
|-----------------------------------------|----------------|--------------|-----------------|
| <b>B220</b>                             | APC            | RA3-6B2      | BioLegend       |
| <b>CD95/Fas</b>                         | PE             | Jo2          | BD Biosciences  |
| <b>CD38</b>                             | PE-Cy7         | 90           | BioLegend       |
| <b>CD19</b>                             | BUV-661        | eBio1D3      | BD Biosciences  |
| <b>CD138</b>                            | BV-785         | 281-2        | BioLegend       |
| <b>CD3</b>                              | PE-Cy7         | 17A2         | BioLegend       |
| <b>CD4</b>                              | BV-650         | RM4-5        | BioLegend       |
| <b>CD8</b>                              | BV-510         | 53-6.7       | BioLegend       |
| <b>CD44</b>                             | BUV-395        | IM7          | BD Biosciences  |
| <b>CD62L</b>                            | PE             | MEL-14       | BioLegend       |
| <b>PD1</b>                              | BV-421         | 29F.1A12     | BioLegend       |
| <b>PDL1</b>                             | PE             | MIH5         | BD Biosciences  |
| <b>IFN-<math>\gamma</math></b>          | FITC           | XMG1.2       | Biolegend       |
| <b>TCF-1</b>                            | PE             | S33-966      | BD Biosciences  |
| <b>Zombie NIR</b>                       | APC/Cy7        | N/A          | Biolegend       |
| <b>7AAD</b>                             | PE-Cy5         | N/A          | Thermo Fisher   |
| <b>Annexin-V</b>                        | APC            | A35110       | Thermo Fisher   |
| <b><math>\gamma</math>H2AX</b>          | BV-421         | N1-431       | BD Biosciences  |
| <b>mBCL2</b>                            | PE             | BCL/10C4X    | BioLegend       |
| <b>hBCL2</b>                            | BV-421         | 100          | BioLegend       |
| <b>Active Casp3</b>                     | PE             | C92-605.1    | BD Biosciences  |
| <b>GFP</b>                              | FITC           | FM264G       | BioLegend       |
| <b>Rab <math>\alpha</math>-mMYC</b>     | N/A            | Y69          | Abcam           |
| <b>Goat <math>\alpha</math>-rab IgG</b> | APC            |              | Invitrogen      |
| <b>Fc receptor block</b>                | N/A            | 2.4G2        | BD Biosciences  |

BUV: Brilliant Ultra Violet. UV: Ultra Violet. m: murine. h: human. rab: rabbit. All antibodies were used at a dilution 1:100 except for secondary antibody goat  $\alpha$ -rabbit IgG (APC) that was used at 1:2000.

**Supplementary Table 2.** List of qRT-PCR Primers used in this study.

| Gene             | Forward Primer (5'-3')   | Reverse Primer (5'-3') |
|------------------|--------------------------|------------------------|
| <i>h/mBCL2</i> * | CACCTGACGCCCTTCACC       | ACACACATGACCCCACCG     |
| <i>Trp53</i>     | CTCTCCCCCGCAAAGAAAAA     | CGGAACATCTCGAAGCGTTTA  |
| <i>Myc</i>       | GTGCTGCATGAGGAGACACC     | AGGGGTTTGCCTCTTCTCC    |
| <i>Bcl-xl</i>    | AACATCCCAGCTTCACATAACCCC | GCGACCCCAGTTTACTCCATCC |

\*: *BCL2* primers recognize both human and murine *BCL2* cDNA sequences and amplify both genes with the same efficiency.
