# Supplementary material for: Venetoclax improves CD20 immunotherapy in a mouse model of MYC/BCL2 double-expressor diffuse large B-cell lymphoma
Source: HighWire-hosted journal article supplement (doi:10.1136/jitc-2022-006113), 2023-02-01

## Venetoclax improves CD20 immunotherapy in a mouse model of MYC/BCL2 double-expressor diffuse large B-cell lymphoma

### Authors

Javier Melchor, Marcos Garcia-Lacarte, Sara C. Grijalba, Adrián Arnaiz-Leché, Marién Pascual, Carlos Panizo, Oscar Blanco, Victor Segura, Francisco J. Novo, Juan Garcia Valero, Patricia Pérez-Galán, Jose Angel Martinez-Climent, and Sergio Roa

### Correspondence

sroa@unav.es

### In Brief

Co-expression of MYC/BCL2 is an early pathogenic mechanism when typical mutations of activated B-cell-like (ABC) diffuse large B-cell lymphomas (DLBCL) are engineered preclinically (pBIC mice). In this scenario, the specific BCL2 inhibitor venetoclax cooperates with anti-CD20-based immunotherapy by licensing direct apoptosis of lymphoma cells and immunomodulating T-cell responses, which results in improved therapeutic responses.

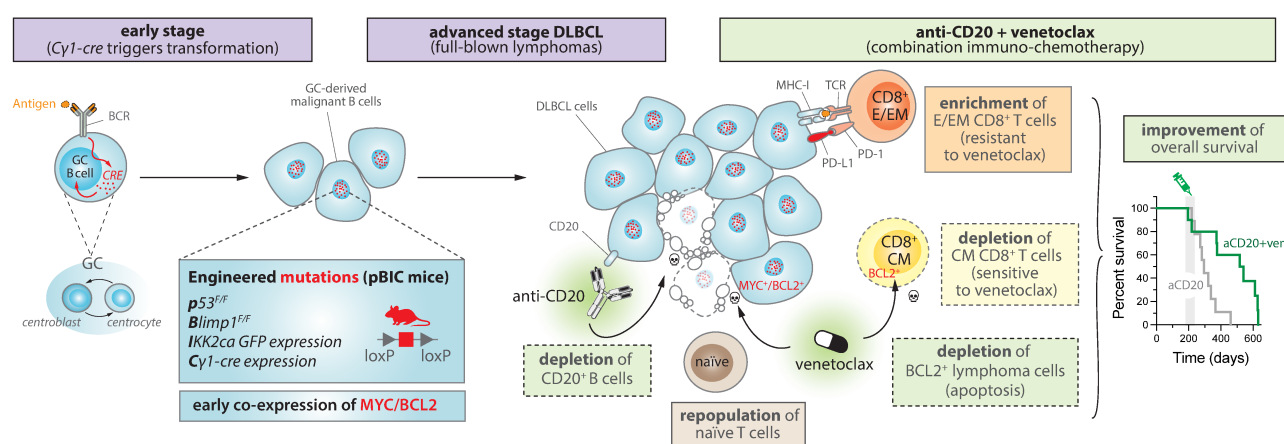

Supplement: jitc-2022-006113supp002_data_supplement.pdf [file jitc-2022-006113supp002_data_supplement.pdf]
